# Supplementary material
Source: MDPI journal article supplement (https://www.mdpi.com/2073-4344/14/2/124)
Supplement: s1 [file s1]

## Supporting Information

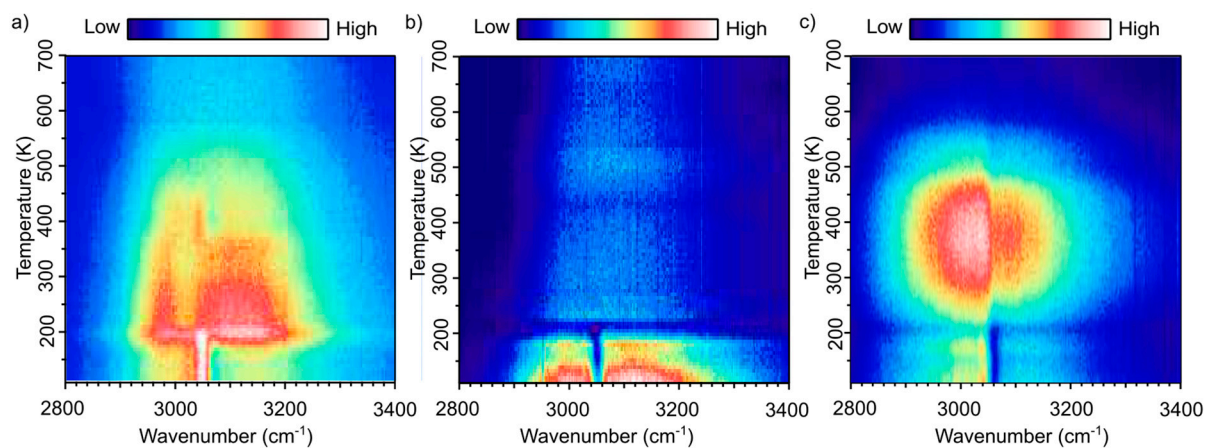

Figure S1, False color plot of temperature dependent SFG spectra recorded from a) Ni(111)-naphthalene, b) Ni(111)-O (2x2) naphthalene and c) Ni(111)-NiO-naphthalene. The slices presented in figure 3 are cut from the data in this figure.

## Coordinates for optimized structures

**Table S1. Naphthalene on Ni(111), ground state**

|     |                            |               |              |
|-----|----------------------------|---------------|--------------|
| i = | 200, E = -24441.6135972239 |               |              |
| Ni  | 12.2813150153              | 11.3449928481 | 0.0000000000 |
| Ni  | 12.2813150153              | 7.0906205301  | 0.0000000000 |
| Ni  | 8.5969205107               | 4.9634343710  | 0.0000000000 |
| Ni  | 11.0531835137              | 4.9634343710  | 0.0000000000 |
| Ni  | 13.5094465168              | 4.9634343710  | 0.0000000000 |
| Ni  | 7.3687890092               | 11.3449928481 | 0.0000000000 |
| Ni  | 9.8250520122               | 7.0906205301  | 0.0000000000 |
| Ni  | 14.7375780183              | 11.3449928481 | 0.0000000000 |
| Ni  | 11.0531835137              | 9.2178066891  | 0.0000000000 |
| Ni  | 14.7375780183              | 2.8362482120  | 0.0000000000 |
| Ni  | 15.9657095198              | 4.9634343710  | 0.0000000000 |
| Ni  | 14.7375780183              | 7.0906205301  | 0.0000000000 |
| Ni  | 8.5969205107               | 9.2178066891  | 0.0000000000 |
| Ni  | 6.1406575076               | 9.2178066891  | 0.0000000000 |
| Ni  | 8.5969205107               | 0.7090620530  | 0.0000000000 |
| Ni  | 6.1406575076               | 0.7090620530  | 0.0000000000 |
| Ni  | 9.8250520122               | 11.3449928481 | 0.0000000000 |
| Ni  | 9.8250520122               | 2.8362482120  | 0.0000000000 |
| Ni  | 13.5094465168              | 9.2178066891  | 0.0000000000 |
| Ni  | 17.1938410213              | 7.0906205301  | 0.0000000000 |
| Ni  | 18.4219725229              | 9.2178066891  | 0.0000000000 |
| Ni  | 19.6501040244              | 11.3449928481 | 0.0000000000 |
| Ni  | 4.9125260061               | 2.8362482120  | 0.0000000000 |
| Ni  | 11.0531835137              | 0.7090620530  | 0.0000000000 |
| Ni  | 13.5094465168              | 0.7090620530  | 0.0000000000 |
| Ni  | 12.2813150153              | 2.8362482120  | 0.0000000000 |
| Ni  | 7.3687890092               | 2.8362482120  | 0.0000000000 |
| Ni  | 1.2281315015               | 0.7090620530  | 0.0000000000 |
| Ni  | 3.6843945046               | 0.7090620530  | 0.0000000000 |
| Ni  | 7.3687890092               | 7.0906205301  | 0.0000000000 |
| Ni  | 2.4562630031               | 2.8362482120  | 0.0000000000 |
| Ni  | 6.1406575076               | 4.9634343710  | 0.0000000000 |
| Ni  | 4.9125260061               | 7.0906205301  | 0.0000000000 |
| Ni  | 17.1938410214              | 11.3449928481 | 0.0000000000 |
| Ni  | 15.9657095198              | 9.2178066891  | 0.0000000000 |
| Ni  | 3.6843945046               | 4.9634343710  | 0.0000000000 |
| Ni  | 14.7375780183              | 4.2543723180  | 2.0052540942 |
| Ni  | 15.9657095198              | 6.3815584771  | 2.0052540942 |
| Ni  | 12.2813150153              | 4.2543723180  | 2.0052540942 |
| Ni  | 13.5094465168              | 6.3815584771  | 2.0052540942 |
| Ni  | 14.7375780183              | 8.5087446361  | 2.0052540942 |
| Ni  | 2.4562630031               | 0.0000000000  | 2.0052540942 |
| Ni  | 1.2281315015               | 2.1271861590  | 2.0052540942 |
| Ni  | 18.4219725229              | 10.6359307951 | 2.0052540942 |
| Ni  | 15.9657095198              | 10.6359307951 | 2.0052540942 |
| Ni  | 12.2813150153              | 0.0000000000  | 2.0052540942 |
| Ni  | 4.9125260061               | 0.0000000000  | 2.0052540942 |

|    |               |               |              |
|----|---------------|---------------|--------------|
| Ni | 11.0531835137 | 2.1271861590  | 2.0052540942 |
| Ni | 9.8250520122  | 0.0000000000  | 2.0052540942 |
| Ni | 13.5094465168 | 2.1271861590  | 2.0052540942 |
| Ni | 6.1406575076  | 6.3815584771  | 2.0052540942 |
| Ni | 2.4562630031  | 4.2543723180  | 2.0052540942 |
| Ni | 3.6843945046  | 6.3815584771  | 2.0052540942 |
| Ni | 4.9125260061  | 4.2543723180  | 2.0052540942 |
| Ni | 8.5969205107  | 10.6359307951 | 2.0052540942 |
| Ni | 0.0000000000  | 0.0000000000  | 2.0052540942 |
| Ni | 4.9125260061  | 8.5087446361  | 2.0052540942 |
| Ni | 6.1406575076  | 10.6359307951 | 2.0052540942 |
| Ni | 7.3687890092  | 8.5087446361  | 2.0052540942 |
| Ni | 8.5969205107  | 2.1271861590  | 2.0052540942 |
| Ni | 11.0531835137 | 6.3815584771  | 2.0052540942 |
| Ni | 8.5969205107  | 6.3815584771  | 2.0052540942 |
| Ni | 9.8250520122  | 4.2543723180  | 2.0052540942 |
| Ni | 12.2813150153 | 8.5087446361  | 2.0052540942 |
| Ni | 11.0531835137 | 10.6359307951 | 2.0052540942 |
| Ni | 9.8250520122  | 8.5087446361  | 2.0052540942 |
| Ni | 13.5094465168 | 10.6359307951 | 2.0052540942 |
| Ni | 17.1938410214 | 8.5087446361  | 2.0052540942 |
| Ni | 7.3687890092  | 0.0000000000  | 2.0052540942 |
| Ni | 6.1406575076  | 2.1271861590  | 2.0052540942 |
| Ni | 7.3687890092  | 4.2543723180  | 2.0052540942 |
| Ni | 3.6843945046  | 2.1271861590  | 2.0052540942 |
| Ni | 17.2018692797 | 9.9364669298  | 4.0221314960 |
| Ni | 18.4288977499 | 12.0572452027 | 4.0216296435 |
| Ni | 19.6600296120 | 9.9179226563  | 4.0235208224 |
| Ni | 11.0560233092 | 3.5528470899  | 4.0460342679 |
| Ni | 3.6873121878  | 3.5379598113  | 4.0224958924 |
| Ni | 6.1500806377  | 7.7840583932  | 4.0324147282 |
| Ni | 4.9011301166  | 5.6732248425  | 3.9850973503 |
| Ni | 8.5992632374  | 7.7768153941  | 4.0889849618 |
| Ni | 4.9182695490  | 1.4040445602  | 4.0228481615 |
| Ni | 12.2830843978 | 9.9127910721  | 4.0232884790 |
| Ni | 13.5181510073 | 12.0454089670 | 4.0219901729 |
| Ni | 14.7499646989 | 9.9319373038  | 4.0217727127 |
| Ni | 9.8165866502  | 9.8979690226  | 4.0383181829 |
| Ni | 8.6036452998  | 12.0373588302 | 4.0223903018 |
| Ni | 7.3877045273  | 9.8992582025  | 4.0392319347 |
| Ni | 11.0571183231 | 12.0354218057 | 4.0227805310 |
| Ni | 13.5244999985 | 7.7976521495  | 3.9876816932 |
| Ni | 9.8362425760  | 5.6625113505  | 4.0877610152 |
| Ni | 11.0518993962 | 7.7815917071  | 4.0231735531 |
| Ni | 12.2832701470 | 5.6494651401  | 4.0277375392 |
| Ni | 20.8872295679 | 12.0380166450 | 4.0224346475 |
| Ni | 9.8347810490  | 1.4451019448  | 4.0380972803 |
| Ni | 8.6064551676  | 3.5585537171  | 4.0373378974 |
| Ni | 7.3781093529  | 1.4183207126  | 4.0226605123 |
| Ni | 7.3801874859  | 5.6813461325  | 4.0362294923 |
| Ni | 14.7470263760 | 1.4046651608  | 4.0233854100 |

|    |               |               |              |
|----|---------------|---------------|--------------|
| Ni | 15.9780134086 | 12.0635260891 | 4.0221864617 |
| Ni | 18.4187591941 | 7.8064976017  | 4.0170052122 |
| Ni | 12.2892140524 | 1.4126219486  | 4.0222281397 |
| Ni | 13.5191725687 | 3.5338884285  | 4.0209458548 |
| Ni | 14.7488263570 | 5.6719562263  | 4.0179764120 |
| Ni | 17.1941216288 | 5.6756239309  | 4.0212547129 |
| Ni | 2.4633514262  | 1.4054927565  | 4.0238481544 |
| Ni | 6.1435218332  | 3.5373768775  | 4.0047124852 |
| Ni | 15.9736902883 | 3.5386647965  | 4.0231864003 |
| Ni | 15.9747996046 | 7.8088484944  | 4.0205951041 |
| Ni | 8.5216318900  | 4.9357674733  | 6.1013050176 |
| Ni | 11.1847817067 | 4.9281855302  | 6.1641515503 |
| Ni | 9.9123320503  | 7.0768336161  | 6.1033235188 |
| Ni | 14.7725348866 | 7.0852158100  | 6.0392792209 |
| Ni | 15.9898920979 | 4.9455226836  | 6.0439426946 |
| Ni | 9.8316094818  | 2.8405849784  | 6.1690292336 |
| Ni | 17.1848352054 | 7.0855948750  | 6.0433716999 |
| Ni | 2.4654725496  | 2.8109622215  | 6.0449681453 |
| Ni | 7.3392831982  | 2.8051383343  | 6.0307143867 |
| Ni | 8.6109157882  | 0.7016590901  | 6.0384335786 |
| Ni | 6.1509610877  | 0.6905670063  | 6.0419673541 |
| Ni | 17.2053412736 | 11.3457589789 | 6.0453583915 |
| Ni | 18.4125546679 | 9.2196403792  | 6.0440756674 |
| Ni | 15.9795536070 | 9.2185653264  | 6.0441673863 |
| Ni | 13.5948301113 | 4.9423509108  | 6.0301306346 |
| Ni | 12.3750479015 | 7.0858729811  | 5.9793506930 |
| Ni | 6.1118317376  | 9.2237935345  | 6.0353910911 |
| Ni | 8.6090082382  | 9.1955790404  | 6.2064484313 |
| Ni | 12.3309519379 | 2.7914362618  | 6.0343087160 |
| Ni | 13.5322825663 | 0.6858159327  | 6.0424994336 |
| Ni | 4.8464706047  | 7.0817875380  | 6.0251482562 |
| Ni | 6.0588140896  | 4.9380645244  | 5.9763290393 |
| Ni | 3.6613187676  | 4.9460975128  | 6.0392829929 |
| Ni | 11.0657030362 | 0.7004173984  | 6.0384534530 |
| Ni | 7.2643681831  | 7.0798135820  | 6.1638457325 |
| Ni | 9.8422845042  | 11.3279707486 | 6.0388802874 |
| Ni | 14.7559128753 | 11.3389852081 | 6.0436548930 |
| Ni | 13.5414936055 | 9.2108436055  | 6.0382726103 |
| Ni | 12.3019496762 | 11.3323760037 | 6.0421073594 |
| Ni | 14.7681066121 | 2.8098719289  | 6.0439911230 |
| Ni | 4.8983947727  | 2.8107193253  | 6.0398922860 |
| Ni | 1.2464923867  | 0.6848613631  | 6.0445627260 |
| Ni | 3.6980510569  | 0.6858864220  | 6.0438404186 |
| Ni | 7.3851472113  | 11.3285571595 | 6.0392679647 |
| Ni | 11.0999622006 | 9.2182861621  | 6.0341542709 |
| Ni | 19.6583540456 | 11.3409466800 | 6.0433327564 |
| C  | 7.3534062099  | 6.4692157016  | 8.0888673752 |
| C  | 7.4017996623  | 7.9001208160  | 8.1221281852 |
| C  | 8.5802576071  | 5.6817892826  | 8.0155161140 |
| C  | 9.8633035586  | 6.3916626298  | 8.0171194953 |
| C  | 9.8901480286  | 7.8343371542  | 8.0642257674 |

|   |               |              |              |
|---|---------------|--------------|--------------|
| C | 8.6666436154  | 8.6145960919 | 8.1313061758 |
| C | 11.0906999594 | 5.6031216247 | 8.0797375807 |
| C | 11.0424471947 | 4.1723098348 | 8.1162796682 |
| C | 9.7771468718  | 3.4583652566 | 8.1064473563 |
| C | 8.5530274637  | 4.2385444222 | 8.0611382065 |
| H | 6.4401887468  | 5.9602012012 | 8.4084519512 |
| H | 6.5078692040  | 8.4415422261 | 8.4394630958 |
| H | 8.7036658361  | 9.5896362692 | 8.6246494878 |
| H | 10.8237764453 | 8.3186513341 | 8.3659200864 |
| H | 12.0044636840 | 6.1118248020 | 8.3987612521 |
| H | 11.9329920720 | 3.6288641009 | 8.4394299097 |
| H | 9.7405536284  | 2.4737615033 | 8.5809770389 |
| H | 7.6231922887  | 3.7526196462 | 8.3707068407 |

**Table S2. Naphthalene on Ni(111)-O (2x2), ground state**

i = 183, E = -24586.0534648148

|    |               |               |              |
|----|---------------|---------------|--------------|
| Ni | 12.2813150153 | 11.3449928481 | 0.0000000000 |
| Ni | 12.2813150153 | 7.0906205301  | 0.0000000000 |
| Ni | 8.5969205107  | 4.9634343710  | 0.0000000000 |
| Ni | 11.0531835137 | 4.9634343710  | 0.0000000000 |
| Ni | 13.5094465168 | 4.9634343710  | 0.0000000000 |
| Ni | 7.3687890092  | 11.3449928481 | 0.0000000000 |
| Ni | 9.8250520122  | 7.0906205301  | 0.0000000000 |
| Ni | 14.7375780183 | 11.3449928481 | 0.0000000000 |
| Ni | 11.0531835137 | 9.2178066891  | 0.0000000000 |
| Ni | 14.7375780183 | 2.8362482120  | 0.0000000000 |
| Ni | 15.9657095198 | 4.9634343710  | 0.0000000000 |
| Ni | 14.7375780183 | 7.0906205301  | 0.0000000000 |
| Ni | 8.5969205107  | 9.2178066891  | 0.0000000000 |
| Ni | 6.1406575076  | 9.2178066891  | 0.0000000000 |
| Ni | 8.5969205107  | 0.7090620530  | 0.0000000000 |
| Ni | 6.1406575076  | 0.7090620530  | 0.0000000000 |
| Ni | 9.8250520122  | 11.3449928481 | 0.0000000000 |
| Ni | 9.8250520122  | 2.8362482120  | 0.0000000000 |
| Ni | 13.5094465168 | 9.2178066891  | 0.0000000000 |
| Ni | 17.1938410213 | 7.0906205301  | 0.0000000000 |
| Ni | 18.4219725229 | 9.2178066891  | 0.0000000000 |
| Ni | 19.6501040244 | 11.3449928481 | 0.0000000000 |
| Ni | 4.9125260061  | 2.8362482120  | 0.0000000000 |
| Ni | 11.0531835137 | 0.7090620530  | 0.0000000000 |
| Ni | 13.5094465168 | 0.7090620530  | 0.0000000000 |
| Ni | 12.2813150153 | 2.8362482120  | 0.0000000000 |
| Ni | 7.3687890092  | 2.8362482120  | 0.0000000000 |
| Ni | 1.2281315015  | 0.7090620530  | 0.0000000000 |
| Ni | 3.6843945046  | 0.7090620530  | 0.0000000000 |
| Ni | 7.3687890092  | 7.0906205301  | 0.0000000000 |
| Ni | 2.4562630031  | 2.8362482120  | 0.0000000000 |
| Ni | 6.1406575076  | 4.9634343710  | 0.0000000000 |
| Ni | 4.9125260061  | 7.0906205301  | 0.0000000000 |
| Ni | 17.1938410214 | 11.3449928481 | 0.0000000000 |
| Ni | 15.9657095198 | 9.2178066891  | 0.0000000000 |
| Ni | 3.6843945046  | 4.9634343710  | 0.0000000000 |
| Ni | 14.7375780183 | 4.2543723180  | 2.0052540942 |
| Ni | 15.9657095198 | 6.3815584771  | 2.0052540942 |
| Ni | 12.2813150153 | 4.2543723180  | 2.0052540942 |
| Ni | 13.5094465168 | 6.3815584771  | 2.0052540942 |
| Ni | 14.7375780183 | 8.5087446361  | 2.0052540942 |
| Ni | 2.4562630031  | 0.0000000000  | 2.0052540942 |
| Ni | 1.2281315015  | 2.1271861590  | 2.0052540942 |
| Ni | 18.4219725229 | 10.6359307951 | 2.0052540942 |
| Ni | 15.9657095198 | 10.6359307951 | 2.0052540942 |
| Ni | 12.2813150153 | 0.0000000000  | 2.0052540942 |
| Ni | 4.9125260061  | 0.0000000000  | 2.0052540942 |
| Ni | 11.0531835137 | 2.1271861590  | 2.0052540942 |
| Ni | 9.8250520122  | 0.0000000000  | 2.0052540942 |

|    |               |               |              |
|----|---------------|---------------|--------------|
| Ni | 13.5094465168 | 2.1271861590  | 2.0052540942 |
| Ni | 6.1406575076  | 6.3815584771  | 2.0052540942 |
| Ni | 2.4562630031  | 4.2543723180  | 2.0052540942 |
| Ni | 3.6843945046  | 6.3815584771  | 2.0052540942 |
| Ni | 4.9125260061  | 4.2543723180  | 2.0052540942 |
| Ni | 8.5969205107  | 10.6359307951 | 2.0052540942 |
| Ni | 0.0000000000  | 0.0000000000  | 2.0052540942 |
| Ni | 4.9125260061  | 8.5087446361  | 2.0052540942 |
| Ni | 6.1406575076  | 10.6359307951 | 2.0052540942 |
| Ni | 7.3687890092  | 8.5087446361  | 2.0052540942 |
| Ni | 8.5969205107  | 2.1271861590  | 2.0052540942 |
| Ni | 11.0531835137 | 6.3815584771  | 2.0052540942 |
| Ni | 8.5969205107  | 6.3815584771  | 2.0052540942 |
| Ni | 9.8250520122  | 4.2543723180  | 2.0052540942 |
| Ni | 12.2813150153 | 8.5087446361  | 2.0052540942 |
| Ni | 11.0531835137 | 10.6359307951 | 2.0052540942 |
| Ni | 9.8250520122  | 8.5087446361  | 2.0052540942 |
| Ni | 13.5094465168 | 10.6359307951 | 2.0052540942 |
| Ni | 17.1938410214 | 8.5087446361  | 2.0052540942 |
| Ni | 7.3687890092  | 0.0000000000  | 2.0052540942 |
| Ni | 6.1406575076  | 2.1271861590  | 2.0052540942 |
| Ni | 7.3687890092  | 4.2543723180  | 2.0052540942 |
| Ni | 3.6843945046  | 2.1271861590  | 2.0052540942 |
| Ni | 17.1991275448 | 9.9097709095  | 4.0174118407 |
| Ni | 18.4219230931 | 12.0303670441 | 4.0177254374 |
| Ni | 19.6467664849 | 9.9082916699  | 4.0181209162 |
| Ni | 11.0521392957 | 3.5167828670  | 4.0903517767 |
| Ni | 3.6837303617  | 3.5198658933  | 4.0175093445 |
| Ni | 6.1416714357  | 7.7723578864  | 4.0231745707 |
| Ni | 4.9170974518  | 5.6541386779  | 4.0175321585 |
| Ni | 8.5896222318  | 7.7820612038  | 4.0903530646 |
| Ni | 4.9075027535  | 1.3999464648  | 4.0177432683 |
| Ni | 12.2837902712 | 9.9080160144  | 4.0195405025 |
| Ni | 13.5080369413 | 12.0284190101 | 4.0178867396 |
| Ni | 14.7337544018 | 9.9100121100  | 4.0176652712 |
| Ni | 9.8170490645  | 9.9058194489  | 4.0244317548 |
| Ni | 8.5962438455  | 12.0281654524 | 4.0178616951 |
| Ni | 7.3746050334  | 9.9080584518  | 4.0232197242 |
| Ni | 11.0516592436 | 12.0310805193 | 4.0830011278 |
| Ni | 13.5134473822 | 7.7817677261  | 4.0742135063 |
| Ni | 9.8294083108  | 5.6551996011  | 4.0167914072 |
| Ni | 11.0514450002 | 7.7753780690  | 4.0137648072 |
| Ni | 12.2763206925 | 5.6535227957  | 4.0143107986 |
| Ni | 20.8777615339 | 12.0328615381 | 4.0827977756 |
| Ni | 9.8193220508  | 1.4029809140  | 4.0233291768 |
| Ni | 8.5996443637  | 3.5199894659  | 4.0244725767 |
| Ni | 7.3727542317  | 1.4010012136  | 4.0173945213 |
| Ni | 7.3657033077  | 5.6577453163  | 4.0248983280 |
| Ni | 14.7320508746 | 1.4003778214  | 4.0182369720 |
| Ni | 15.9653961480 | 12.0332349903 | 4.0820392898 |
| Ni | 18.4219002318 | 7.7779518055  | 4.0822947563 |

|    |               |               |              |
|----|---------------|---------------|--------------|
| Ni | 12.2855564865 | 1.4028695747  | 4.0234842596 |
| Ni | 13.5050360696 | 3.5188884001  | 4.0244107655 |
| Ni | 14.7398003659 | 5.6539196147  | 4.0195278230 |
| Ni | 17.1880795254 | 5.6536920895  | 4.0181905357 |
| Ni | 2.4601457683  | 1.4001907166  | 4.0176827746 |
| Ni | 6.1418898018  | 3.5248854026  | 4.0820151272 |
| Ni | 15.9633257215 | 3.5237395050  | 4.0831272882 |
| Ni | 15.9663805338 | 7.7746683140  | 4.0173795963 |
| Ni | 8.6010823469  | 4.9377022844  | 5.9774182909 |
| Ni | 11.0540663798 | 4.8940296731  | 6.1004176385 |
| Ni | 9.7896419753  | 7.0843630660  | 6.0993455870 |
| Ni | 14.7157884597 | 7.0783028891  | 6.1075267091 |
| Ni | 15.9623124434 | 4.9045992540  | 6.1095048873 |
| Ni | 9.8514028386  | 2.8214360515  | 6.1531788370 |
| Ni | 17.2195270804 | 7.0775551544  | 6.1081251093 |
| Ni | 2.4294488349  | 2.8222877171  | 6.1075203875 |
| Ni | 7.3411261244  | 2.8225054069  | 6.1072480938 |
| Ni | 8.5938300097  | 0.6464484729  | 6.1066863526 |
| Ni | 6.1397907797  | 0.6815853290  | 5.9703352316 |
| Ni | 17.1687394286 | 11.3312606879 | 6.1073639643 |
| Ni | 18.4223515125 | 9.1599843896  | 6.1082905164 |
| Ni | 15.9684515674 | 9.1919729629  | 5.9704747987 |
| Ni | 13.5054730984 | 4.9356601777  | 5.9762042008 |
| Ni | 12.3274951506 | 7.0914266001  | 6.0914364562 |
| Ni | 6.1433952990  | 9.1884635342  | 5.9725089386 |
| Ni | 8.5918223730  | 9.1597872677  | 6.1529836765 |
| Ni | 12.2534477022 | 2.8186899097  | 6.1523739577 |
| Ni | 13.5089097975 | 0.6500776108  | 6.1096910724 |
| Ni | 4.8823237468  | 7.0761156662  | 6.1063181288 |
| Ni | 6.1399263923  | 4.9024791592  | 6.1078603404 |
| Ni | 3.6833484717  | 4.9360226262  | 5.9703432578 |
| Ni | 11.0522955237 | 0.6847540306  | 5.9724149934 |
| Ni | 7.3939008093  | 7.0778600192  | 6.1530179475 |
| Ni | 9.8507545574  | 11.3326943896 | 6.1093552480 |
| Ni | 14.7636324036 | 11.3316725323 | 6.1080191096 |
| Ni | 13.5120280837 | 9.1642481145  | 6.1084330913 |
| Ni | 12.2533391187 | 11.3300852561 | 6.1085971735 |
| Ni | 14.7631715946 | 2.8230055176  | 6.1098927031 |
| Ni | 4.9384006687  | 2.8230579441  | 6.1076444327 |
| Ni | 1.2279401762  | 0.6823991504  | 5.9702725605 |
| Ni | 3.6830003620  | 0.6508864793  | 6.1083745766 |
| Ni | 7.3421040387  | 11.3320154475 | 6.1084271348 |
| Ni | 11.0495173548 | 9.1899330205  | 5.9764664317 |
| Ni | 19.6768443835 | 11.3321467770 | 6.1074499471 |
| O  | 3.6845721388  | 2.1001524555  | 7.1991166122 |
| O  | 6.1133628912  | 6.3406863571  | 7.2109897167 |
| O  | 8.5962290061  | 10.6324250167 | 7.2151992651 |
| O  | 8.5729143483  | 2.0801138220  | 7.2108297726 |
| O  | 11.0717726323 | 6.3654479278  | 7.1346181075 |
| O  | 13.5092219998 | 10.6112592888 | 7.2019948353 |
| O  | 13.5291617440 | 2.0868161399  | 7.2166634076 |



|   |               |               |              |
|---|---------------|---------------|--------------|
| O | 15.9668766852 | 6.3531230052  | 7.2016977657 |
| O | 18.4234967046 | 10.6090240190 | 7.1995696875 |
| C | 8.5811606473  | 6.4320603659  | 9.3599260822 |
| C | 8.6332444029  | 7.8148214576  | 9.3665750258 |
| C | 9.7606490381  | 5.6623249677  | 9.5386511474 |
| C | 11.0059874562 | 6.3406689233  | 9.7811926918 |
| C | 11.0152536748 | 7.7611816178  | 9.8290784439 |
| C | 9.8609359495  | 8.4843689066  | 9.6003479723 |
| C | 12.2045054625 | 5.5782742737  | 9.8289107984 |
| C | 12.1868209139 | 4.2167202265  | 9.5968869008 |
| C | 10.9593132025 | 3.5492666715  | 9.3568176451 |
| C | 9.7687788232  | 4.2550253992  | 9.3516768972 |
| H | 7.6372616631  | 5.9213742583  | 9.1647005510 |
| H | 7.7278586748  | 8.3953821628  | 9.1854066921 |
| H | 9.8872319145  | 9.5741330314  | 9.5811810490 |
| H | 11.9647496295 | 8.2759311225  | 9.9882080800 |
| H | 13.1515567275 | 6.0967949797  | 9.9904675172 |
| H | 13.1168280326 | 3.6481010283  | 9.5774957151 |
| H | 10.9556752447 | 2.4745647363  | 9.1707232429 |
| H | 8.8282703166  | 3.7388820559  | 9.1532238099 |

**Table S3. Naphthalene on NiO**

i = 50, E = -25592.5587255368

|    |               |               |              |
|----|---------------|---------------|--------------|
| Ni | 12.2813150153 | 11.3449928481 | 0.0000000000 |
| Ni | 12.2813150153 | 7.0906205301  | 0.0000000000 |
| Ni | 8.5969205107  | 4.9634343710  | 0.0000000000 |
| Ni | 11.0531835137 | 4.9634343710  | 0.0000000000 |
| Ni | 13.5094465168 | 4.9634343710  | 0.0000000000 |
| Ni | 7.3687890092  | 11.3449928481 | 0.0000000000 |
| Ni | 9.8250520122  | 7.0906205301  | 0.0000000000 |
| Ni | 14.7375780183 | 11.3449928481 | 0.0000000000 |
| Ni | 11.0531835137 | 9.2178066891  | 0.0000000000 |
| Ni | 14.7375780183 | 2.8362482120  | 0.0000000000 |
| Ni | 15.9657095198 | 4.9634343710  | 0.0000000000 |
| Ni | 14.7375780183 | 7.0906205301  | 0.0000000000 |
| Ni | 8.5969205107  | 9.2178066891  | 0.0000000000 |
| Ni | 6.1406575076  | 9.2178066891  | 0.0000000000 |
| Ni | 8.5969205107  | 0.7090620530  | 0.0000000000 |
| Ni | 6.1406575076  | 0.7090620530  | 0.0000000000 |
| Ni | 9.8250520122  | 11.3449928481 | 0.0000000000 |
| Ni | 9.8250520122  | 2.8362482120  | 0.0000000000 |
| Ni | 13.5094465168 | 9.2178066891  | 0.0000000000 |
| Ni | 17.1938410213 | 7.0906205301  | 0.0000000000 |
| Ni | 18.4219725229 | 9.2178066891  | 0.0000000000 |
| Ni | 19.6501040244 | 11.3449928481 | 0.0000000000 |
| Ni | 4.9125260061  | 2.8362482120  | 0.0000000000 |
| Ni | 11.0531835137 | 0.7090620530  | 0.0000000000 |
| Ni | 13.5094465168 | 0.7090620530  | 0.0000000000 |
| Ni | 12.2813150153 | 2.8362482120  | 0.0000000000 |
| Ni | 7.3687890092  | 2.8362482120  | 0.0000000000 |
| Ni | 1.2281315015  | 0.7090620530  | 0.0000000000 |
| Ni | 3.6843945046  | 0.7090620530  | 0.0000000000 |
| Ni | 7.3687890092  | 7.0906205301  | 0.0000000000 |
| Ni | 2.4562630031  | 2.8362482120  | 0.0000000000 |
| Ni | 6.1406575076  | 4.9634343710  | 0.0000000000 |
| Ni | 4.9125260061  | 7.0906205301  | 0.0000000000 |
| Ni | 17.1938410214 | 11.3449928481 | 0.0000000000 |
| Ni | 15.9657095198 | 9.2178066891  | 0.0000000000 |
| Ni | 3.6843945046  | 4.9634343710  | 0.0000000000 |
| Ni | 14.7375780183 | 4.2543723180  | 2.0052540942 |
| Ni | 15.9657095198 | 6.3815584771  | 2.0052540942 |
| Ni | 12.2813150153 | 4.2543723180  | 2.0052540942 |
| Ni | 13.5094465168 | 6.3815584771  | 2.0052540942 |
| Ni | 14.7375780183 | 8.5087446361  | 2.0052540942 |
| Ni | 2.4562630031  | 0.0000000000  | 2.0052540942 |
| Ni | 1.2281315015  | 2.1271861590  | 2.0052540942 |
| Ni | 18.4219725229 | 10.6359307951 | 2.0052540942 |
| Ni | 15.9657095198 | 10.6359307951 | 2.0052540942 |
| Ni | 12.2813150153 | 0.0000000000  | 2.0052540942 |
| Ni | 4.9125260061  | 0.0000000000  | 2.0052540942 |
| Ni | 11.0531835137 | 2.1271861590  | 2.0052540942 |
| Ni | 9.8250520122  | 0.0000000000  | 2.0052540942 |

|    |               |               |              |
|----|---------------|---------------|--------------|
| Ni | 13.5094465168 | 2.1271861590  | 2.0052540942 |
| Ni | 6.1406575076  | 6.3815584771  | 2.0052540942 |
| Ni | 2.4562630031  | 4.2543723180  | 2.0052540942 |
| Ni | 3.6843945046  | 6.3815584771  | 2.0052540942 |
| Ni | 4.9125260061  | 4.2543723180  | 2.0052540942 |
| Ni | 8.5969205107  | 10.6359307951 | 2.0052540942 |
| Ni | 0.0000000000  | 0.0000000000  | 2.0052540942 |
| Ni | 4.9125260061  | 8.5087446361  | 2.0052540942 |
| Ni | 6.1406575076  | 10.6359307951 | 2.0052540942 |
| Ni | 7.3687890092  | 8.5087446361  | 2.0052540942 |
| Ni | 8.5969205107  | 2.1271861590  | 2.0052540942 |
| Ni | 11.0531835137 | 6.3815584771  | 2.0052540942 |
| Ni | 8.5969205107  | 6.3815584771  | 2.0052540942 |
| Ni | 9.8250520122  | 4.2543723180  | 2.0052540942 |
| Ni | 12.2813150153 | 8.5087446361  | 2.0052540942 |
| Ni | 11.0531835137 | 10.6359307951 | 2.0052540942 |
| Ni | 9.8250520122  | 8.5087446361  | 2.0052540942 |
| Ni | 13.5094465168 | 10.6359307951 | 2.0052540942 |
| Ni | 17.1938410214 | 8.5087446361  | 2.0052540942 |
| Ni | 7.3687890092  | 0.0000000000  | 2.0052540942 |
| Ni | 6.1406575076  | 2.1271861590  | 2.0052540942 |
| Ni | 7.3687890092  | 4.2543723180  | 2.0052540942 |
| Ni | 3.6843945046  | 2.1271861590  | 2.0052540942 |
| Ni | 17.1345503862 | 9.8927082142  | 4.0282468403 |
| Ni | 18.3626022775 | 12.0200910068 | 4.0284923422 |
| Ni | 19.5909743749 | 9.8924889518  | 4.0285011791 |
| Ni | 10.9927990845 | 3.5107501291  | 4.0275305597 |
| Ni | 3.6253335099  | 3.5110513071  | 4.0282423108 |
| Ni | 6.0816100480  | 7.7652485925  | 4.0280262795 |
| Ni | 4.8533855921  | 5.6381525949  | 4.0281756931 |
| Ni | 8.5368916798  | 7.7648089267  | 4.0273260074 |
| Ni | 4.8534017138  | 1.3839637877  | 4.0282204377 |
| Ni | 12.2222998142 | 9.8924022929  | 4.0282559154 |
| Ni | 13.4502974395 | 12.0200670371 | 4.0281356220 |
| Ni | 14.6784560727 | 9.8929695588  | 4.0278729421 |
| Ni | 9.7659539115  | 9.8923920141  | 4.0276673932 |
| Ni | 8.5380251530  | 12.0198985598 | 4.0278032777 |
| Ni | 7.3096227250  | 9.8926356470  | 4.0276680713 |
| Ni | 10.9943888789 | 12.0195323639 | 4.0284065041 |
| Ni | 13.4506578418 | 7.7657590453  | 4.0282126040 |
| Ni | 9.7654687029  | 5.6380064172  | 4.0269887839 |
| Ni | 10.9944895960 | 7.7650783352  | 4.0279151171 |
| Ni | 12.2220848176 | 5.6389923699  | 4.0278522487 |
| Ni | 20.8189689864 | 12.0198293318 | 4.0280823610 |
| Ni | 9.7659305062  | 1.3841789025  | 4.0279815751 |
| Ni | 8.5369621645  | 3.5107308955  | 4.0272191197 |
| Ni | 7.3095712110  | 1.3839918124  | 4.0282352931 |
| Ni | 7.3088872060  | 5.6377859001  | 4.0272934531 |
| Ni | 14.6786202786 | 1.3842326251  | 4.0277979901 |
| Ni | 15.9063670892 | 12.0201599738 | 4.0283075246 |
| Ni | 18.3628990423 | 7.7653038177  | 4.0282552115 |

|     |               |               |              |
|-----|---------------|---------------|--------------|
| Ni  | 12.2221698563 | 1.3840513809  | 4.0275905346 |
| Ni  | 13.4499617173 | 3.5114306546  | 4.0277847657 |
| Ni  | 14.6782290431 | 5.6386284990  | 4.0281776741 |
| Ni  | 17.1347721434 | 5.6382241685  | 4.0281383994 |
| Ni  | 2.3973693311  | 1.3840767916  | 4.0284500288 |
| Ni  | 6.0814713771  | 3.5110369667  | 4.0275695009 |
| Ni  | 15.9064244876 | 3.5116066160  | 4.0284608563 |
| Ni  | 15.9067709938 | 7.7654843352  | 4.0278865845 |
| O   | 15.1917884402 | 4.5165533399  | 5.6898528070 |
| O   | 16.4202584696 | 6.6440259279  | 5.6886588072 |
| O   | 12.7378145430 | 4.5158034988  | 5.6909715855 |
| O   | 13.9646386095 | 6.6434736928  | 5.6885950171 |
| O   | 15.1917918166 | 8.7709439041  | 5.6906239459 |
| O   | 2.9110219269  | 0.2627896180  | 5.6879771690 |
| O   | 1.6830088877  | 2.3897395329  | 5.6877738232 |
| O   | 18.8764851649 | 10.8983026726 | 5.6879056729 |
| O   | 16.4202119156 | 10.8982244500 | 5.6884116961 |
| O   | 12.7364846114 | 0.2620223940  | 5.6892635059 |
| O   | 5.3672710873  | 0.2623956517  | 5.6890478656 |
| O   | 11.5099525579 | 2.3880853705  | 5.6890399371 |
| O   | 10.2794530604 | 0.2622622839  | 5.6878670167 |
| O   | 13.9653858627 | 2.3884467668  | 5.6877886399 |
| O   | 6.5938314818  | 6.6431058761  | 5.6872212474 |
| O   | 2.9107096720  | 4.5170518613  | 5.6891333146 |
| O   | 4.1386109270  | 6.6440968738  | 5.6891611034 |
| O   | 5.3667717686  | 4.5168278612  | 5.6897628879 |
| O   | 9.0512150572  | 10.9001701978 | 5.6880722599 |
| O   | 0.4542791691  | 0.2622684119  | 5.6912369720 |
| O   | 5.3668442487  | 8.7711343366  | 5.6882626997 |
| O   | 6.5952158697  | 10.8990359922 | 5.6889719838 |
| O   | 7.8232521394  | 8.7735329751  | 5.6884522378 |
| O   | 9.0498730473  | 2.3889109590  | 5.6878091512 |
| O   | 11.5090255327 | 6.6449400594  | 5.6800980587 |
| O   | 9.0517617305  | 6.6483398056  | 5.6853381528 |
| O   | 10.2839871866 | 4.5144635392  | 5.6831458612 |
| O   | 12.7358029181 | 8.7720057953  | 5.6889825370 |
| O   | 11.5074367245 | 10.8984502753 | 5.6893563578 |
| O   | 10.2798747315 | 8.7734924267  | 5.6908203819 |
| O   | 13.9640833855 | 10.8983880800 | 5.6886718127 |
| O   | 17.6482273322 | 8.7711857736  | 5.6884509583 |
| O   | 7.8232824445  | 0.2621698411  | 5.6892305311 |
| O   | 6.5952095343  | 2.3894674859  | 5.6901573569 |
| O   | 7.8221477502  | 4.5164816370  | 5.6874589635 |
| O   | 4.1398058797  | 2.3901930839  | 5.6890084047 |
| Ni2 | 9.0302936519  | 5.2137696654  | 6.9726316806 |
| Ni2 | 11.4870330952 | 5.2143178646  | 6.9764791778 |
| Ni2 | 10.2593782595 | 7.3413281909  | 6.9762985351 |
| Ni2 | 15.1702862829 | 7.3402936058  | 6.9799624928 |
| Ni2 | 16.3984768496 | 5.2134537985  | 6.9801495417 |
| Ni2 | 10.2583685930 | 3.0846562351  | 6.9775151795 |
| Ni2 | 17.6266113985 | 7.3406358845  | 6.9800938739 |

|     |               |               |              |
|-----|---------------|---------------|--------------|
| Ni2 | 2.8891505661  | 3.0860809962  | 6.9799700549 |
| Ni2 | 7.8016381267  | 3.0859851718  | 6.9796472785 |
| Ni2 | 9.0295652470  | 0.9589048347  | 6.9798603255 |
| Ni2 | 6.5736391443  | 0.9588954427  | 6.9803702471 |
| Ni2 | 17.6267163256 | 11.5948019487 | 6.9800425991 |
| Ni2 | 18.8547013459 | 9.4677950120  | 6.9800037946 |
| Ni2 | 16.3987532065 | 9.4677799698  | 6.9800554445 |
| Ni2 | 13.9425599617 | 5.2136567899  | 6.9808817202 |
| Ni2 | 12.7139212885 | 7.3403221079  | 6.9789746428 |
| Ni2 | 6.5733889359  | 9.4685228180  | 6.9792213149 |
| Ni2 | 9.0301595411  | 9.4691265175  | 6.9791138034 |
| Ni2 | 12.7154321237 | 3.0858853929  | 6.9797483287 |
| Ni2 | 13.9426465721 | 0.9590063496  | 6.9801046046 |
| Ni2 | 5.3450615171  | 7.3403672098  | 6.9797169406 |
| Ni2 | 6.5730501908  | 5.2136854257  | 6.9795439188 |
| Ni2 | 4.1171974079  | 5.2134778759  | 6.9803067788 |
| Ni2 | 11.4866445023 | 0.9583831799  | 6.9790927427 |
| Ni2 | 7.8005730955  | 7.3418561286  | 6.9773344971 |
| Ni2 | 10.2579102922 | 11.5953171202 | 6.9799478345 |
| Ni2 | 15.1705459229 | 11.5948056369 | 6.9801496180 |
| Ni2 | 13.9421048604 | 9.4677713328  | 6.9800400314 |
| Ni2 | 12.7142650550 | 11.5948432522 | 6.9801650967 |
| Ni2 | 15.1705401287 | 3.0859837411  | 6.9799421987 |
| Ni2 | 5.3457134818  | 3.0864438055  | 6.9802621896 |
| Ni2 | 1.6615293160  | 0.9593216689  | 6.9800129821 |
| Ni2 | 4.1172717361  | 0.9591297574  | 6.9800146759 |
| Ni2 | 7.8017995480  | 11.5951600786 | 6.9801786360 |
| Ni2 | 11.4865806859 | 9.4680193517  | 6.9808365608 |
| Ni2 | 20.0829533145 | 11.5948488098 | 6.9800651845 |
| O   | 17.6156488510 | 10.1704055790 | 8.1281483879 |
| O   | 18.8434414924 | 12.2981470826 | 8.1288188112 |
| O   | 20.0722579808 | 10.1697641702 | 8.1287910734 |
| O   | 11.4755496605 | 3.7907503355  | 8.1265105675 |
| O   | 4.1065919503  | 3.7886594792  | 8.1292406986 |
| O   | 6.5609592638  | 8.0464341343  | 8.1276048136 |
| O   | 5.3336400472  | 5.9152424658  | 8.1316178441 |
| O   | 9.0207356405  | 8.0436278704  | 8.1249913109 |
| O   | 5.3344864743  | 1.6622158702  | 8.1292983569 |
| O   | 12.7031095659 | 10.1700568617 | 8.1291253105 |
| O   | 13.9314597914 | 12.2978357661 | 8.1284329698 |
| O   | 15.1591537182 | 10.1704131408 | 8.1280223422 |
| O   | 10.2461127405 | 10.1707914889 | 8.1305379558 |
| O   | 9.0191072902  | 12.2975779703 | 8.1286603488 |
| O   | 7.7909930906  | 10.1706202941 | 8.1302404882 |
| O   | 11.4751271524 | 12.2976680638 | 8.1281648755 |
| O   | 13.9302505080 | 8.0426602006  | 8.1291679136 |
| O   | 10.2453451743 | 5.9157284110  | 8.1207024317 |
| O   | 11.4752926044 | 8.0415536646  | 8.1311096296 |
| O   | 12.7016100914 | 5.9168894132  | 8.1311496500 |
| O   | 21.2998010667 | 12.2974710723 | 8.1286532900 |
| O   | 10.2493534736 | 1.6584793019  | 8.1273806018 |

|   |               |               |               |
|---|---------------|---------------|---------------|
| O | 9.0203669096  | 3.7936331808  | 8.1232029077  |
| O | 7.7894154068  | 1.6614167279  | 8.1318601387  |
| O | 7.7947127516  | 5.9159451592  | 8.1241749623  |
| O | 15.1595489511 | 1.6620480313  | 8.1285997633  |
| O | 16.3876805165 | 12.2980082248 | 8.1296057191  |
| O | 18.8438821195 | 8.0433052608  | 8.1294704235  |
| O | 12.7037295581 | 1.6616255636  | 8.1302123161  |
| O | 13.9309182929 | 3.7881640398  | 8.1306795337  |
| O | 15.1590011543 | 5.9162318977  | 8.1290167233  |
| O | 17.6158568976 | 5.9160102397  | 8.1283299574  |
| O | 2.8782408264  | 1.6617330210  | 8.1279739491  |
| O | 6.5614176242  | 3.7884629990  | 8.1325534285  |
| O | 16.3875264297 | 3.7888158927  | 8.1280940695  |
| O | 16.3874319769 | 8.0428605183  | 8.1280025985  |
| C | 7.5053118990  | 5.8225587464  | 10.8809987344 |
| C | 7.5877840397  | 7.2139826830  | 10.8878419347 |
| C | 8.6755750143  | 5.0270469641  | 10.9348497216 |
| C | 9.9561418898  | 5.6752426023  | 10.9715591750 |
| C | 10.0089439782 | 7.0901511315  | 10.9548293172 |
| C | 8.8395257678  | 7.8472337158  | 10.9191055450 |
| C | 11.1285322132 | 4.8812657519  | 10.9574066518 |
| C | 11.0467604949 | 3.4907204742  | 10.9214270207 |
| C | 9.7961516550  | 2.8559152559  | 10.8871867049 |
| C | 8.6255904626  | 3.6134515788  | 10.8808548087 |
| H | 6.5351473023  | 5.3315027861  | 10.8010285958 |
| H | 6.6791213477  | 7.8086683185  | 10.8154651333 |
| H | 8.8990108640  | 8.9335564256  | 10.8720533816 |
| H | 10.9807288518 | 7.5837629643  | 10.9283382672 |
| H | 12.1009934625 | 5.3737919011  | 10.9320301057 |
| H | 11.9581939849 | 2.8966436237  | 10.8751593182 |
| H | 9.7380248265  | 1.7715283019  | 10.8141934302 |
| H | 7.6560890593  | 3.1214476536  | 10.7993161928 |

**Table S4. Dissociated naphthalene on Ni(111)-O (2x2). Flat**

|     |               |               |                   |
|-----|---------------|---------------|-------------------|
| i = | 200,          | E =           | -24586.0165140281 |
| Ni  | 12.2813150153 | 11.3449928481 | 0.0000000000      |
| Ni  | 12.2813150153 | 7.0906205301  | 0.0000000000      |
| Ni  | 8.5969205107  | 4.9634343710  | 0.0000000000      |
| Ni  | 11.0531835137 | 4.9634343710  | 0.0000000000      |
| Ni  | 13.5094465168 | 4.9634343710  | 0.0000000000      |
| Ni  | 7.3687890092  | 11.3449928481 | 0.0000000000      |
| Ni  | 9.8250520122  | 7.0906205301  | 0.0000000000      |
| Ni  | 14.7375780183 | 11.3449928481 | 0.0000000000      |
| Ni  | 11.0531835137 | 9.2178066891  | 0.0000000000      |
| Ni  | 14.7375780183 | 2.8362482120  | 0.0000000000      |
| Ni  | 15.9657095198 | 4.9634343710  | 0.0000000000      |
| Ni  | 14.7375780183 | 7.0906205301  | 0.0000000000      |
| Ni  | 8.5969205107  | 9.2178066891  | 0.0000000000      |
| Ni  | 6.1406575076  | 9.2178066891  | 0.0000000000      |
| Ni  | 8.5969205107  | 0.7090620530  | 0.0000000000      |
| Ni  | 6.1406575076  | 0.7090620530  | 0.0000000000      |
| Ni  | 9.8250520122  | 11.3449928481 | 0.0000000000      |
| Ni  | 9.8250520122  | 2.8362482120  | 0.0000000000      |
| Ni  | 13.5094465168 | 9.2178066891  | 0.0000000000      |
| Ni  | 17.1938410213 | 7.0906205301  | 0.0000000000      |
| Ni  | 18.4219725229 | 9.2178066891  | 0.0000000000      |
| Ni  | 19.6501040244 | 11.3449928481 | 0.0000000000      |
| Ni  | 4.9125260061  | 2.8362482120  | 0.0000000000      |
| Ni  | 11.0531835137 | 0.7090620530  | 0.0000000000      |
| Ni  | 13.5094465168 | 0.7090620530  | 0.0000000000      |
| Ni  | 12.2813150153 | 2.8362482120  | 0.0000000000      |
| Ni  | 7.3687890092  | 2.8362482120  | 0.0000000000      |
| Ni  | 1.2281315015  | 0.7090620530  | 0.0000000000      |
| Ni  | 3.6843945046  | 0.7090620530  | 0.0000000000      |
| Ni  | 7.3687890092  | 7.0906205301  | 0.0000000000      |
| Ni  | 2.4562630031  | 2.8362482120  | 0.0000000000      |
| Ni  | 6.1406575076  | 4.9634343710  | 0.0000000000      |
| Ni  | 4.9125260061  | 7.0906205301  | 0.0000000000      |
| Ni  | 17.1938410214 | 11.3449928481 | 0.0000000000      |
| Ni  | 15.9657095198 | 9.2178066891  | 0.0000000000      |
| Ni  | 3.6843945046  | 4.9634343710  | 0.0000000000      |
| Ni  | 14.7375780183 | 4.2543723180  | 2.0052540942      |
| Ni  | 15.9657095198 | 6.3815584771  | 2.0052540942      |
| Ni  | 12.2813150153 | 4.2543723180  | 2.0052540942      |
| Ni  | 13.5094465168 | 6.3815584771  | 2.0052540942      |
| Ni  | 14.7375780183 | 8.5087446361  | 2.0052540942      |
| Ni  | 2.4562630031  | 0.0000000000  | 2.0052540942      |
| Ni  | 1.2281315015  | 2.1271861590  | 2.0052540942      |
| Ni  | 18.4219725229 | 10.6359307951 | 2.0052540942      |
| Ni  | 15.9657095198 | 10.6359307951 | 2.0052540942      |
| Ni  | 12.2813150153 | 0.0000000000  | 2.0052540942      |
| Ni  | 4.9125260061  | 0.0000000000  | 2.0052540942      |
| Ni  | 11.0531835137 | 2.1271861590  | 2.0052540942      |
| Ni  | 9.8250520122  | 0.0000000000  | 2.0052540942      |

|    |               |               |              |
|----|---------------|---------------|--------------|
| Ni | 13.5094465168 | 2.1271861590  | 2.0052540942 |
| Ni | 6.1406575076  | 6.3815584771  | 2.0052540942 |
| Ni | 2.4562630031  | 4.2543723180  | 2.0052540942 |
| Ni | 3.6843945046  | 6.3815584771  | 2.0052540942 |
| Ni | 4.9125260061  | 4.2543723180  | 2.0052540942 |
| Ni | 8.5969205107  | 10.6359307951 | 2.0052540942 |
| Ni | 0.0000000000  | 0.0000000000  | 2.0052540942 |
| Ni | 4.9125260061  | 8.5087446361  | 2.0052540942 |
| Ni | 6.1406575076  | 10.6359307951 | 2.0052540942 |
| Ni | 7.3687890092  | 8.5087446361  | 2.0052540942 |
| Ni | 8.5969205107  | 2.1271861590  | 2.0052540942 |
| Ni | 11.0531835137 | 6.3815584771  | 2.0052540942 |
| Ni | 8.5969205107  | 6.3815584771  | 2.0052540942 |
| Ni | 9.8250520122  | 4.2543723180  | 2.0052540942 |
| Ni | 12.2813150153 | 8.5087446361  | 2.0052540942 |
| Ni | 11.0531835137 | 10.6359307951 | 2.0052540942 |
| Ni | 9.8250520122  | 8.5087446361  | 2.0052540942 |
| Ni | 13.5094465168 | 10.6359307951 | 2.0052540942 |
| Ni | 17.1938410214 | 8.5087446361  | 2.0052540942 |
| Ni | 7.3687890092  | 0.0000000000  | 2.0052540942 |
| Ni | 6.1406575076  | 2.1271861590  | 2.0052540942 |
| Ni | 7.3687890092  | 4.2543723180  | 2.0052540942 |
| Ni | 3.6843945046  | 2.1271861590  | 2.0052540942 |
| Ni | 17.2146368447 | 9.9404784409  | 4.0175023597 |
| Ni | 18.4368791569 | 12.0651504169 | 4.0181178735 |
| Ni | 19.6621078729 | 9.9390427333  | 4.0175807206 |
| Ni | 11.0474227491 | 3.5376773213  | 4.1506631620 |
| Ni | 3.7019236156  | 3.5497482523  | 4.0230987157 |
| Ni | 6.1579329787  | 7.8012848624  | 4.0135728686 |
| Ni | 4.9391379751  | 5.6829993773  | 4.0223524556 |
| Ni | 8.6138966634  | 7.8087441973  | 4.0862753375 |
| Ni | 4.9217541420  | 1.4331657248  | 4.0240211347 |
| Ni | 12.2996891699 | 9.9353576477  | 4.0172359051 |
| Ni | 13.5231187243 | 12.0575267925 | 4.0156477715 |
| Ni | 14.7482686773 | 9.9360356349  | 4.0149484407 |
| Ni | 9.8334228515  | 9.9342220387  | 4.0230207866 |
| Ni | 8.6116233148  | 12.0570853388 | 4.0181788299 |
| Ni | 7.3914773234  | 9.9357311257  | 4.0229518288 |
| Ni | 11.0675754437 | 12.0619801879 | 4.0826044353 |
| Ni | 13.5259055745 | 7.8052783957  | 4.0737375780 |
| Ni | 9.8380987692  | 5.6705735465  | 4.0302645287 |
| Ni | 11.0658660834 | 7.7964583719  | 4.0125538503 |
| Ni | 12.2752810936 | 5.6699670333  | 4.0238336491 |
| Ni | 20.8940369711 | 12.0621497142 | 4.0797327605 |
| Ni | 9.8256978005  | 1.4478168391  | 4.0381393674 |
| Ni | 8.6199984375  | 3.5444876920  | 4.0794802878 |
| Ni | 7.3877853583  | 1.4320600458  | 4.0148000957 |
| Ni | 7.3879174741  | 5.6741537465  | 4.0302591746 |
| Ni | 14.7463008441 | 1.4303688809  | 4.0118529514 |
| Ni | 15.9819279420 | 12.0630199932 | 4.0772157951 |
| Ni | 18.4380023905 | 7.8098374592  | 4.0802764360 |



|    |               |               |              |
|----|---------------|---------------|--------------|
| Ni | 12.2960051728 | 1.4346845467  | 4.0242723122 |
| Ni | 13.5083517032 | 3.5425641245  | 4.0250897889 |
| Ni | 14.7502173461 | 5.6797702317  | 4.0178706584 |
| Ni | 17.2060914098 | 5.6839725334  | 4.0160314947 |
| Ni | 2.4754611624  | 1.4312052645  | 4.0164879895 |
| Ni | 6.1534764774  | 3.5563352260  | 4.0884504791 |
| Ni | 15.9810933918 | 3.5580332506  | 4.0744859017 |
| Ni | 15.9801883501 | 7.8019909282  | 4.0164050972 |
| Ni | 8.6319418106  | 4.9677277755  | 6.0407421912 |
| Ni | 11.0848153652 | 4.9449053461  | 6.1553691730 |
| Ni | 9.8286289724  | 7.1227906351  | 6.1054390776 |
| Ni | 14.7389339584 | 7.1189316026  | 6.1059779628 |
| Ni | 15.9885002699 | 4.9524008911  | 6.1061252300 |
| Ni | 9.8785069644  | 2.8504669498  | 6.5322676978 |
| Ni | 17.2418397045 | 7.1244472790  | 6.1075085695 |
| Ni | 2.4488081529  | 2.8638569867  | 6.1034395400 |
| Ni | 7.3444414432  | 2.8331496986  | 6.1037082495 |
| Ni | 8.6041430776  | 0.6678847197  | 6.0914987145 |
| Ni | 6.1504924103  | 0.7052319949  | 5.9683492790 |
| Ni | 17.1898438392 | 11.3705845125 | 6.1066902445 |
| Ni | 18.4431376656 | 9.2067200000  | 6.1079363938 |
| Ni | 15.9902647478 | 9.2299051633  | 5.9698369629 |
| Ni | 13.5319726959 | 4.9741659603  | 5.9731753578 |
| Ni | 12.3515557441 | 7.1277494776  | 6.0973734212 |
| Ni | 6.1621455705  | 9.2322790954  | 5.9705525633 |
| Ni | 8.6181992216  | 9.1985821645  | 6.1505382644 |
| Ni | 12.2854629406 | 2.8611760387  | 6.1635353225 |
| Ni | 13.5327211357 | 0.6869174280  | 6.0994944272 |
| Ni | 4.9010707222  | 7.1281629028  | 6.1011969772 |
| Ni | 6.1494314787  | 4.9595133879  | 6.1526892014 |
| Ni | 3.6985197608  | 4.9846424892  | 5.9694533640 |
| Ni | 11.0542139988 | 0.7359037367  | 5.9668985038 |
| Ni | 7.4164452102  | 7.1251151713  | 6.0968212989 |
| Ni | 9.8692771786  | 11.3670291898 | 6.1089924719 |
| Ni | 14.7798660320 | 11.3576649657 | 6.1057989000 |
| Ni | 13.5345604866 | 9.2001615325  | 6.1041245331 |
| Ni | 12.2716857003 | 11.3647925384 | 6.1075712801 |
| Ni | 14.8042273666 | 2.8744767029  | 6.0948530735 |
| Ni | 4.9220246587  | 2.8516893350  | 6.1608224823 |
| Ni | 1.2467944585  | 0.7192661560  | 5.9682952133 |
| Ni | 3.6951422112  | 0.6842651120  | 6.1069580269 |
| Ni | 7.3644809474  | 11.3687602209 | 6.1085279346 |
| Ni | 11.0747932971 | 9.2249873811  | 5.9702155953 |
| Ni | 19.6973259916 | 11.3794395416 | 6.1071402618 |
| O  | 3.6447554091  | 2.1040034916  | 7.2279351822 |
| O  | 6.1509102587  | 6.4501571057  | 7.2102003262 |
| O  | 8.6166983319  | 10.6612028898 | 7.2163938025 |
| O  | 8.4461317858  | 1.9951187805  | 7.2875651607 |
| O  | 11.1130921691 | 6.4521098159  | 7.1922280615 |
| O  | 13.5264058338 | 10.6434280858 | 7.2004739748 |
| O  | 13.6183096680 | 2.1159237304  | 7.1950714881 |

|   |               |               |               |
|---|---------------|---------------|---------------|
| O | 15.9912986560 | 6.3982229440  | 7.2010824463  |
| O | 18.4454396544 | 10.6537041029 | 7.2008043420  |
| C | 8.8747322396  | 5.1230308014  | 8.6343689942  |
| C | 8.5176016300  | 6.2990852436  | 9.2773731489  |
| C | 10.0418844776 | 4.3991515629  | 8.9960908725  |
| C | 10.7718120692 | 4.8425974292  | 10.1562655848 |
| C | 10.4063860553 | 6.0710595476  | 10.7658636178 |
| C | 9.3190783271  | 6.8005476444  | 10.3220887388 |
| C | 11.8116442692 | 4.0270922100  | 10.6745919126 |
| C | 12.0855174160 | 2.8015298839  | 10.1049027879 |
| C | 11.4259289140 | 2.4046053588  | 8.9185093902  |
| C | 10.5193923600 | 3.2514475616  | 8.2915552289  |
| H | 8.1461369830  | 4.6403572845  | 7.9558220846  |
| H | 7.6029971736  | 6.8112172428  | 8.9849706615  |
| H | 9.0532680304  | 7.7411509698  | 10.8046910643 |
| H | 10.9979066411 | 6.4252423962  | 11.6124854569 |
| H | 12.3601912079 | 4.3670403093  | 11.5545043059 |
| H | 12.8384127754 | 2.1405587164  | 10.5349115913 |
| H | 11.6745902653 | 1.4372078281  | 8.4822584309  |
| H | 6.1364505577  | 3.5513342448  | 7.0494193333  |

**Table S5. Dissociated naphthalene on Ni(111)-O (2x2). Standing**

|     |               |               |                   |
|-----|---------------|---------------|-------------------|
| i = | 200,          | E =           | -24586.0256722785 |
| Ni  | 12.2813150153 | 11.3449928481 | 0.0000000000      |
| Ni  | 12.2813150153 | 7.0906205301  | 0.0000000000      |
| Ni  | 8.5969205107  | 4.9634343710  | 0.0000000000      |
| Ni  | 11.0531835137 | 4.9634343710  | 0.0000000000      |
| Ni  | 13.5094465168 | 4.9634343710  | 0.0000000000      |
| Ni  | 7.3687890092  | 11.3449928481 | 0.0000000000      |
| Ni  | 9.8250520122  | 7.0906205301  | 0.0000000000      |
| Ni  | 14.7375780183 | 11.3449928481 | 0.0000000000      |
| Ni  | 11.0531835137 | 9.2178066891  | 0.0000000000      |
| Ni  | 14.7375780183 | 2.8362482120  | 0.0000000000      |
| Ni  | 15.9657095198 | 4.9634343710  | 0.0000000000      |
| Ni  | 14.7375780183 | 7.0906205301  | 0.0000000000      |
| Ni  | 8.5969205107  | 9.2178066891  | 0.0000000000      |
| Ni  | 6.1406575076  | 9.2178066891  | 0.0000000000      |
| Ni  | 8.5969205107  | 0.7090620530  | 0.0000000000      |
| Ni  | 6.1406575076  | 0.7090620530  | 0.0000000000      |
| Ni  | 9.8250520122  | 11.3449928481 | 0.0000000000      |
| Ni  | 9.8250520122  | 2.8362482120  | 0.0000000000      |
| Ni  | 13.5094465168 | 9.2178066891  | 0.0000000000      |
| Ni  | 17.1938410213 | 7.0906205301  | 0.0000000000      |
| Ni  | 18.4219725229 | 9.2178066891  | 0.0000000000      |
| Ni  | 19.6501040244 | 11.3449928481 | 0.0000000000      |
| Ni  | 4.9125260061  | 2.8362482120  | 0.0000000000      |
| Ni  | 11.0531835137 | 0.7090620530  | 0.0000000000      |
| Ni  | 13.5094465168 | 0.7090620530  | 0.0000000000      |
| Ni  | 12.2813150153 | 2.8362482120  | 0.0000000000      |
| Ni  | 7.3687890092  | 2.8362482120  | 0.0000000000      |
| Ni  | 1.2281315015  | 0.7090620530  | 0.0000000000      |
| Ni  | 3.6843945046  | 0.7090620530  | 0.0000000000      |
| Ni  | 7.3687890092  | 7.0906205301  | 0.0000000000      |
| Ni  | 2.4562630031  | 2.8362482120  | 0.0000000000      |
| Ni  | 6.1406575076  | 4.9634343710  | 0.0000000000      |
| Ni  | 4.9125260061  | 7.0906205301  | 0.0000000000      |
| Ni  | 17.1938410214 | 11.3449928481 | 0.0000000000      |
| Ni  | 15.9657095198 | 9.2178066891  | 0.0000000000      |
| Ni  | 3.6843945046  | 4.9634343710  | 0.0000000000      |
| Ni  | 14.7375780183 | 4.2543723180  | 2.0052540942      |
| Ni  | 15.9657095198 | 6.3815584771  | 2.0052540942      |
| Ni  | 12.2813150153 | 4.2543723180  | 2.0052540942      |
| Ni  | 13.5094465168 | 6.3815584771  | 2.0052540942      |
| Ni  | 14.7375780183 | 8.5087446361  | 2.0052540942      |
| Ni  | 2.4562630031  | 0.0000000000  | 2.0052540942      |
| Ni  | 1.2281315015  | 2.1271861590  | 2.0052540942      |
| Ni  | 18.4219725229 | 10.6359307951 | 2.0052540942      |
| Ni  | 15.9657095198 | 10.6359307951 | 2.0052540942      |
| Ni  | 12.2813150153 | 0.0000000000  | 2.0052540942      |
| Ni  | 4.9125260061  | 0.0000000000  | 2.0052540942      |
| Ni  | 11.0531835137 | 2.1271861590  | 2.0052540942      |
| Ni  | 9.8250520122  | 0.0000000000  | 2.0052540942      |

|    |               |               |              |
|----|---------------|---------------|--------------|
| Ni | 13.5094465168 | 2.1271861590  | 2.0052540942 |
| Ni | 6.1406575076  | 6.3815584771  | 2.0052540942 |
| Ni | 2.4562630031  | 4.2543723180  | 2.0052540942 |
| Ni | 3.6843945046  | 6.3815584771  | 2.0052540942 |
| Ni | 4.9125260061  | 4.2543723180  | 2.0052540942 |
| Ni | 8.5969205107  | 10.6359307951 | 2.0052540942 |
| Ni | 0.0000000000  | 0.0000000000  | 2.0052540942 |
| Ni | 4.9125260061  | 8.5087446361  | 2.0052540942 |
| Ni | 6.1406575076  | 10.6359307951 | 2.0052540942 |
| Ni | 7.3687890092  | 8.5087446361  | 2.0052540942 |
| Ni | 8.5969205107  | 2.1271861590  | 2.0052540942 |
| Ni | 11.0531835137 | 6.3815584771  | 2.0052540942 |
| Ni | 8.5969205107  | 6.3815584771  | 2.0052540942 |
| Ni | 9.8250520122  | 4.2543723180  | 2.0052540942 |
| Ni | 12.2813150153 | 8.5087446361  | 2.0052540942 |
| Ni | 11.0531835137 | 10.6359307951 | 2.0052540942 |
| Ni | 9.8250520122  | 8.5087446361  | 2.0052540942 |
| Ni | 13.5094465168 | 10.6359307951 | 2.0052540942 |
| Ni | 17.1938410214 | 8.5087446361  | 2.0052540942 |
| Ni | 7.3687890092  | 0.0000000000  | 2.0052540942 |
| Ni | 6.1406575076  | 2.1271861590  | 2.0052540942 |
| Ni | 7.3687890092  | 4.2543723180  | 2.0052540942 |
| Ni | 3.6843945046  | 2.1271861590  | 2.0052540942 |
| Ni | 17.2024880210 | 9.9245928310  | 4.0240470880 |
| Ni | 18.4212976866 | 12.0423664707 | 4.0226642705 |
| Ni | 19.6417865253 | 9.9158545906  | 4.0139668921 |
| Ni | 11.0730710925 | 3.5484519433  | 4.1467519849 |
| Ni | 3.6812228440  | 3.5242587176  | 4.0155063744 |
| Ni | 6.1324820751  | 7.7769699286  | 4.0269611353 |
| Ni | 4.9109216262  | 5.6635323456  | 4.0231015890 |
| Ni | 8.5755763474  | 7.7954740249  | 4.0802359023 |
| Ni | 4.9091636224  | 1.4040758407  | 4.0180535492 |
| Ni | 12.2863074631 | 9.9201178894  | 4.0240722292 |
| Ni | 13.5112010160 | 12.0335309870 | 4.0280238135 |
| Ni | 14.7402363187 | 9.9272242912  | 4.0230437937 |
| Ni | 9.8108076262  | 9.9179631854  | 4.0273505930 |
| Ni | 8.5959555368  | 12.0320642505 | 4.0229216280 |
| Ni | 7.3657169176  | 9.9168845726  | 4.0222379960 |
| Ni | 11.0523982030 | 12.0316515801 | 4.0933920462 |
| Ni | 13.5184900166 | 7.7947550542  | 4.0454776882 |
| Ni | 9.8462451737  | 5.6551841966  | 4.0351607082 |
| Ni | 11.0478916470 | 7.7880625662  | 3.9791002572 |
| Ni | 12.2684821540 | 5.6551675998  | 4.0342086122 |
| Ni | 20.8728027362 | 12.0417085771 | 4.0785682959 |
| Ni | 9.8207190292  | 1.4121281709  | 4.0076344787 |
| Ni | 8.5966465817  | 3.5357410921  | 3.9847447293 |
| Ni | 7.3785413890  | 1.4108221789  | 4.0239718354 |
| Ni | 7.3628923792  | 5.6678996189  | 4.0236796814 |
| Ni | 14.7275875793 | 1.4055529476  | 4.0107141576 |
| Ni | 15.9678122000 | 12.0443217285 | 4.0991806526 |
| Ni | 18.4199360855 | 7.7785764887  | 4.0867015459 |

|    |               |               |              |
|----|---------------|---------------|--------------|
| Ni | 12.2829578687 | 1.4343187007  | 4.0401525804 |
| Ni | 13.4979364709 | 3.5247901299  | 4.0415309727 |
| Ni | 14.7249065604 | 5.6521471174  | 4.0269882398 |
| Ni | 17.1803835037 | 5.6589805609  | 4.0145916062 |
| Ni | 2.4601050183  | 1.4020873630  | 4.0184991499 |
| Ni | 6.1337407854  | 3.5378906841  | 4.0776424973 |
| Ni | 15.9622712181 | 3.5284119046  | 4.0771643478 |
| Ni | 15.9650881046 | 7.7819340931  | 4.0171397091 |
| Ni | 8.5800638189  | 4.9526607168  | 5.9671795884 |
| Ni | 11.0106898304 | 4.9544122853  | 6.3485533951 |
| Ni | 9.7627825967  | 7.1300889701  | 6.0444232619 |
| Ni | 14.7106354824 | 7.0877265534  | 6.0994164402 |
| Ni | 15.9607650385 | 4.9075866405  | 6.1003082807 |
| Ni | 9.8087862800  | 2.8281309607  | 6.0388386003 |
| Ni | 17.2128433301 | 7.0779976598  | 6.1102337527 |
| Ni | 2.4303499609  | 2.8252743197  | 6.1066916427 |
| Ni | 7.3105494605  | 2.8590032019  | 6.0957570001 |
| Ni | 8.5716128840  | 0.6807112747  | 6.1592161364 |
| Ni | 6.1373329926  | 0.6932674798  | 5.9714735782 |
| Ni | 17.1816094955 | 11.3147436444 | 6.1622635491 |
| Ni | 18.4217771462 | 9.1460350615  | 6.1022808100 |
| Ni | 15.9736003112 | 9.1991404851  | 5.9710178280 |
| Ni | 13.4866996219 | 4.9482536316  | 6.0318000280 |
| Ni | 12.3216082356 | 7.1374309991  | 6.0376435002 |
| Ni | 6.1297307887  | 9.1925581893  | 5.9721919222 |
| Ni | 8.5719283734  | 9.1844287639  | 6.1508814057 |
| Ni | 12.2272972361 | 2.8087840405  | 6.4112495344 |
| Ni | 13.5072407481 | 0.6387089105  | 6.0888076697 |
| Ni | 4.8775831916  | 7.0766972824  | 6.1541918673 |
| Ni | 6.1199405916  | 4.9289611359  | 6.1130336478 |
| Ni | 3.6698451706  | 4.9433019809  | 5.9700391094 |
| Ni | 11.0551988392 | 0.6975032478  | 5.9761938219 |
| Ni | 7.3804864085  | 7.0905511275  | 6.1537906135 |
| Ni | 9.8490364927  | 11.3413047033 | 6.1551496165 |
| Ni | 14.7627254802 | 11.3408818260 | 6.1531604449 |
| Ni | 13.5245210573 | 9.1869328655  | 6.1044704982 |
| Ni | 12.2522406864 | 11.3394302377 | 6.1541648462 |
| Ni | 14.7753332517 | 2.8141968761  | 6.0890762730 |
| Ni | 4.9261441536  | 2.8363816752  | 6.1050959225 |
| Ni | 1.2275347430  | 0.6833621162  | 5.9703837063 |
| Ni | 3.6817060396  | 0.6562651340  | 6.1107437645 |
| Ni | 7.3441856949  | 11.3331557564 | 6.1090859523 |
| Ni | 11.0449343706 | 9.2125576150  | 5.9683471634 |
| Ni | 19.6776273917 | 11.3265950398 | 6.1062395363 |
| O  | 3.6812149262  | 2.1064210070  | 7.2016740233 |
| O  | 6.1330180170  | 6.3502052563  | 7.2435555836 |
| O  | 8.5789795955  | 10.6329002947 | 7.2385340951 |
| O  | 8.5475038761  | 2.1845179006  | 7.2053100599 |
| O  | 11.0409534435 | 6.6193895906  | 7.1673082902 |
| O  | 13.5097767475 | 10.6054591112 | 7.2358699516 |
| O  | 13.6511618804 | 1.9979139533  | 7.2506557044 |

|   |               |               |               |
|---|---------------|---------------|---------------|
| O | 15.9539295404 | 6.3537781667  | 7.2009565863  |
| O | 18.4767185618 | 10.5507385046 | 7.2211628035  |
| C | 9.2806990453  | 5.4430111830  | 10.1178661262 |
| C | 9.1231827735  | 6.4943099600  | 11.0036905354 |
| C | 10.5523386967 | 5.1572144890  | 9.5693085769  |
| C | 11.6827807645 | 5.9534123199  | 9.9518296775  |
| C | 11.4935528593 | 7.0093365248  | 10.8736869107 |
| C | 10.2344608358 | 7.2800691548  | 11.3819966274 |
| C | 12.9573076247 | 5.6454530340  | 9.3953986016  |
| C | 13.0977109607 | 4.6678658357  | 8.4318210477  |
| C | 11.9485035210 | 3.9656870860  | 7.9122876342  |
| C | 10.7095690116 | 4.1456996777  | 8.5723093537  |
| H | 8.4221014852  | 4.8493085847  | 9.7987389050  |
| H | 8.1354659440  | 6.7263850241  | 11.4026193521 |
| H | 10.0955486552 | 8.1103868902  | 12.0750143448 |
| H | 12.3503620094 | 7.6200780582  | 11.1625033603 |
| H | 13.8381359024 | 6.1956360565  | 9.7313768205  |
| H | 14.1080281142 | 4.3756299126  | 8.1140848558  |
| H | 9.8786616086  | 0.0193475536  | 6.9566546087  |
| H | 9.8655230276  | 3.4819635422  | 8.3875631458  |
